# Supplementary material for: TCRep 3D: An Automated In Silico Approach to Study the Structural Properties of TCR Repertoires
Source: PLoS One. 2011 Oct 28;6(10):e26301. doi: 10.1371/journal.pone.0026301 (PMC3203878; doi:10.1371/journal.pone.0026301)
Supplement: Table S2 — Table of the canonical groups defined by Al-Lazikani et al. [5]. Angles and SD values were updated with more recent structures (see Methods). Key residues are highlighted. The canonical group α2-1 is entirely defined by residues that are external to the CDR (e.g. Phe 32 and Leu 66). (XLS) [file pone.0026301.s005.xls]

## Sheet: Feuille 1 - Tableau 1
α1-1	φ	σ	ψ	σ	β1-1	φ	σ	ψ	σ
Tyr 24	-129.51	13.42	160.84	11.12	Gln 25	-137.77	11.71	142.21	15.69
Residue 25	-105.1	11.22	-18.33	56.22	Residue 26	-117.94	15.22	26.72	13.56
Residue 26	-83.34	21.59	113.23	14.57	Residue 27	-103.74	21.17	3.8	12.62
Residue 27	-59.48	12.88	-24.41	15.29	Residue 28	46.77	34.72	32.58	15.04
Residue 28	-88.85	16.02	21.23	61.36	His 29	-82.7	14.9	140.7	10.12
Phe/Ser 29	-61.62	12.82	131.78	10.64	Residue 30	-85.82	16.33	-29.05	12.26
Residue 30	-115.73	17.21	3.23	53.86	Residue 31	-99.54	15.2	123.04	21.31
Residue 31	-128.8	9.43	129.75	10.44	Met 32	-127.34	17.98	149.64	4.02
Residue 32	-127	7.11	124.17	26.44	β1-2	φ	σ	ψ	σ
α1-2	φ	σ	ψ	σ	Pro 25	-64.63	5.74	161.73	2.19
Tyr 24	-137.6	15.37	157.19	10.23	Residue 26	-62.2	2.1	132.06	3.17
Residue 25	-126.36	10.48	114.42	19.05	Residue 27	-47.96	6.42	136.54	0.93
Residue 26	-163.05	24.04	130.87	23.57	Residue 28	92.57	5.99	-36.47	14.61
Residue 27	-83.23	22.8	51.96	64.33	His 29	-61.19	0.47	128.98	2.55
Residue 28	66.09	130.31	-162.97	17.59	Residue 30	-89.13	14.48	-46.17	1.2
Residue 29	-105.21	21.17	99.66	16.99	Residue 31	-76.28	16.4	131.28	17.31
Pro 30	-74.77	14.72	163.25	15.78	Val 32	-139.01	7.35	116.33	10.58
Residue 31	-96.33	15.85	136.97	18.09	β1-3	φ	σ	ψ	σ
Residue 32	-121.4	14.42	146.74	6.38	Leu/Ile/Val 25	-80.69	3.08	122.33	8.4
α1-3	φ	σ	ψ	σ	Residue 26	-89.67	9.45	-38.95	20.81
Tyr 24	-126.86	21.15	126.94	67.12	Residue 27	-104.75	20.6	120.62	6.97
Residue 25	-105.9	69.82	24.83	106.6	Residue 28	-77.09	6.63	-1.18	6.64
Thr 26	-105.84	26.17	92.39	89.57	Residue 29	-80.91	15.75	-0.26	14.83
Residue 27	-82.78	26.69	67.09	119.09	Tyr 30	-131	8.45	136.56	4.57
Residue 28	-104.2	10.2	166.19	6.88	Residue 31	36.12	5.5	108.99	8.44
Thr 29	-71.43	8.3	48.4	94.03	Met 32	-117.53	2.58	134.52	3.68
Residue 30	-79.99	28.95	-52.89	178.07	Residue 33	-125.43	7.47	167.21	6.28
Residue 31	-118.32	51.86	149.78	6.76	β2-1	φ	σ	ψ	σ
Phe 32	-111.83	15.68	130.82	25.23	Ser 49	-145.06	10	135.56	12.47
Residue 33	-126.64	21.71	157.36	7.65	Residue 50	-95.13	12.73	-2.73	9.33
α2-1	φ	σ	ψ	σ	Residue 51	171.43	22.31	168.28	10.42
Residue 49	-141.78	12.33	142.47	14.18	Residue 52	-52.89	12.81	132.29	8.31
Residue 50	-85.77	34.24	-26.76	15.03	Residue 53	82.62	11.67	-4.27	20.27
Residue 51	-86.64	27.95	64.82	94.32	Residue 54	-114.93	25.07	136.41	12.6
Residue 52	-99.57	9.2	25.52	58.12	Residue 55	-148.3	9.57	138.36	14.49
Residue 53	-101.95	51.82	-78.09	76.7	β2-2	φ	σ	ψ	σ
α2-2	φ	σ	ψ	σ	His 49	-132.49	3.82	121.79	14.91
Ile 49	-143.28	12.99	140.05	12.74	Residue 50	-106.71	24.97	44.97	97.68
Residue 50	-91.77	24.83	-146.82	87.66	Residue 51	-25.38	97.76	-174.6	58.4
Residue 51	-73.81	21.57	25.43	74.81	Residue 52	-78.41	36.62	90.84	67.98
Residue 52	-76.78	13.54	18.89	66.34	Residue 53	43.82	91.95	25.51	69
Residue 53	-136.59	78.62	114.46	67.74	Residue 54	-71.32	9.13	125.73	13.03
Residue 54	-106.96	22.09	48.38	80.78	Residue 55	-123.28	17.6	102.21	78.25
α2-3	φ	σ	ψ	σ
Tyr 49	-171.99	57.21	156.54	59.75
Residue 50	-77.54	32.74	-77.14	34.85
Residue 51	-174.35	9.1	-177.85	19.36
Residue 52	139.83	69.33	177.24	82.65
Residue 53	10.35	104.84	48.04	93
Residue 54	-44.25	24.7	-33.69	30.53
α2-4	φ	σ	ψ	σ
Ala 49	-141.504	0	133.969	0
Residue 50	-103.493	0	-22.09	0
Residue 51	-128.348	0	159.71	0
Residue 52	-65.106	0	139.141	0
Residue 53	79.589	0	-9.436	0
Residue 54	-68.988	0	139.832	0
